# Supplementary material for: CO2 capture and conversion to syngas via dry reforming of C3H8 over a Pt/ZrO2–CaO catalyst
Source: Royal Society of Chemistry journal article supplement (doi:10.1039/d3cy00049d), 2023-01-01
Supplement: d3cy00049d1.pdf [file d3cy00049d1.pdf]

## Supporting Information

**CO<sub>2</sub> capture and conversion to syngas via the dry reforming of C<sub>3</sub>H<sub>8</sub> over**

**Pt/ZrO<sub>2</sub>-CaO catalyst**

Jingjing Dong, Yang Peng, Juanting Li, Zhong-wen Liu, Rongrong Hu\*

Key Laboratory of Syngas Conversion of Shaanxi Province, School of Chemistry & Chemical

Engineering, Shaanxi Normal University, Xi'an 710119, Shaanxi, China

\* To whom correspondence should be addressed. [rrhu@snnu.edu.cn](mailto:rrhu@snnu.edu.cn)

## FIGURE AND TABLE CAPTIONS

**Figure S1.** N<sub>2</sub> adsorption-desorption isotherm (A), pore size distribution (B) of the fresh Pt/ZrO<sub>2</sub>-xCaO catalysts

**Figure S2.** XRD pattern of Pt/ZrO<sub>2</sub>-xCaO after capturing CO<sub>2</sub> at 600 °C for 2 h

**Figure S3.** The CO<sub>2</sub> carbonation-calcination performance of Pt/ZrO<sub>2</sub>-30CaO at different desorption temperatures

**Figure S4.** The result of CO<sub>2</sub> capture and conversion in Ar over ZrO<sub>2</sub>-30CaO  
Capture condition: 600 °C, 20% CO<sub>2</sub>/N<sub>2</sub>/Ar, conversion condition: 600 °C, 5 % C<sub>3</sub>H<sub>8</sub>  
/Ar/N<sub>2</sub>, release condition: 700 °C, N<sub>2</sub>

**Figure S5.** The CO<sub>2</sub> carbonation performance of the spent Pt/ZrO<sub>2</sub>-xCaO catalysts at 600 °C for 60 min

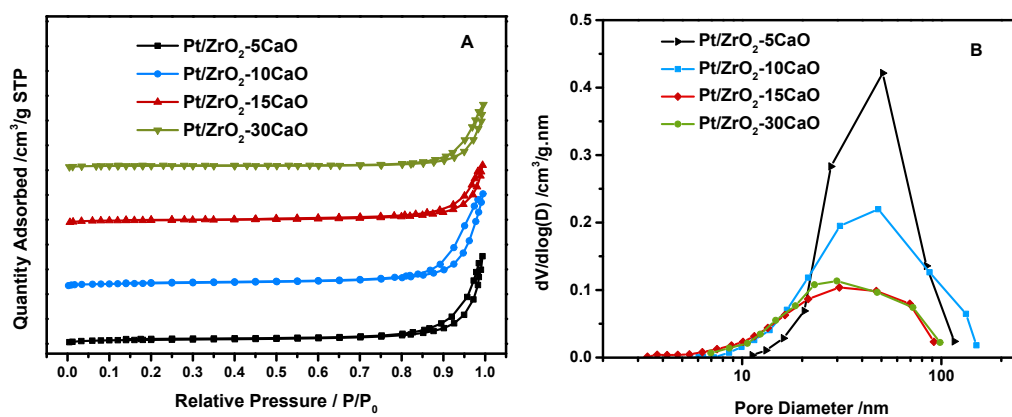

**Figure S1.** N<sub>2</sub> adsorption-desorption isotherm (A), pore size distribution (B) of the fresh Pt/ZrO<sub>2</sub>-xCaO catalysts

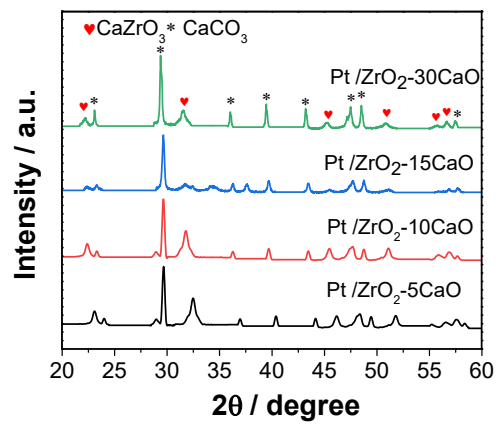

**Figure S2.** XRD patterns of Pt/ZrO<sub>2</sub>-xCaO after capturing CO<sub>2</sub> at 600 °C for 2 h.

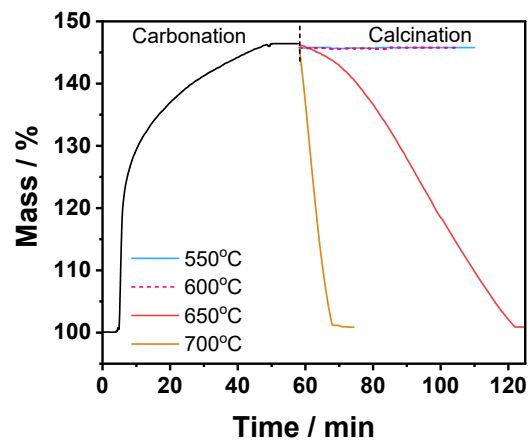

**Figure S3.** The CO<sub>2</sub> carbonation-calcination performance of Pt/ZrO<sub>2</sub>-30CaO at different desorption temperatures

carbonation conditions: 600 °C in 20% CO<sub>2</sub>/Ar, calcination condition: 700, 650, 600, 550°C in Ar

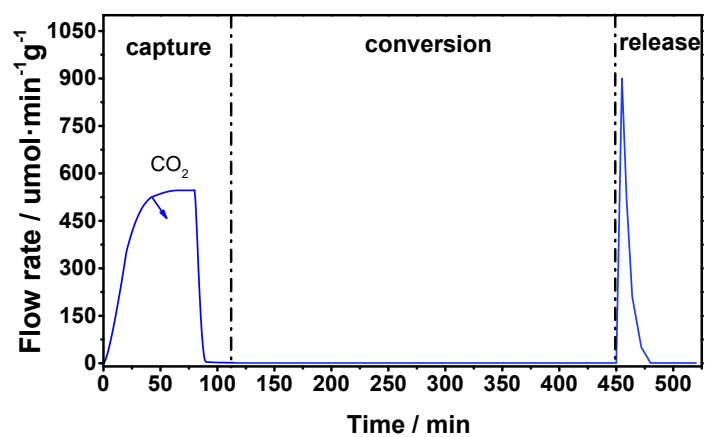

**Figure S4.** The result of CO<sub>2</sub> capture and conversion in Ar over ZrO<sub>2</sub>-30CaO  
Capture condition: 600 °C, 20% CO<sub>2</sub>/N<sub>2</sub>/Ar, conversion condition: 600 °C, 5 % C<sub>3</sub>H<sub>8</sub> /Ar/N<sub>2</sub>,  
release condition: 700 °C, N<sub>2</sub>

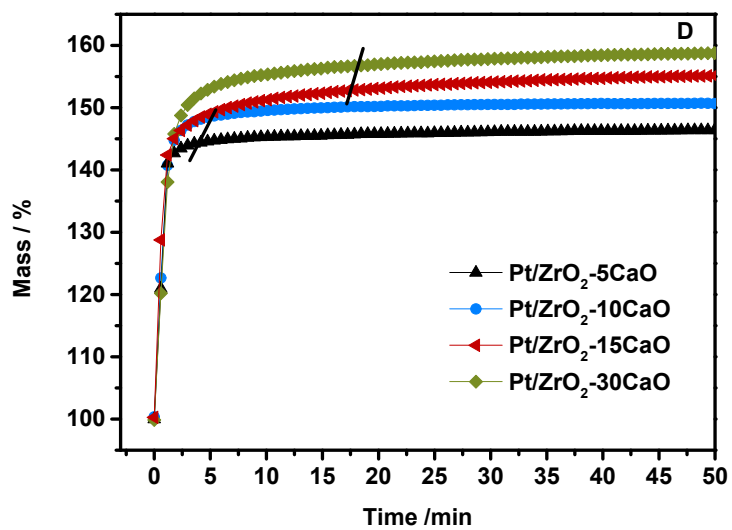

**Figure S5.** The CO<sub>2</sub> carbonation performance of the spent Pt/ZrO<sub>2</sub>-xCaO catalysts at 600 °C for 60 min
